# Supplementary material for: Influence of Polymer Relaxation Time on the Electrospinning Process: Numerical Investigation
Source: MDPI journal article supplement (doi:10.3390/polym9100501), 2017-10-12
Supplement: s1 [file s1]

# Influence of polymer relaxation time on the electrospinning process: numerical investigation

Siddharth Gadkari

## Supplementary Material 2: Validation Studies

### 1 Validation studies

The numerical analysis was validated by comparing against previously reported results in literature. For the Newtonian case ( $B = 1$  or  $\phi_0 = 0$ ) an excellent agreement was obtained with the results of [1] and [2] as shown in Figures 1 and 2.

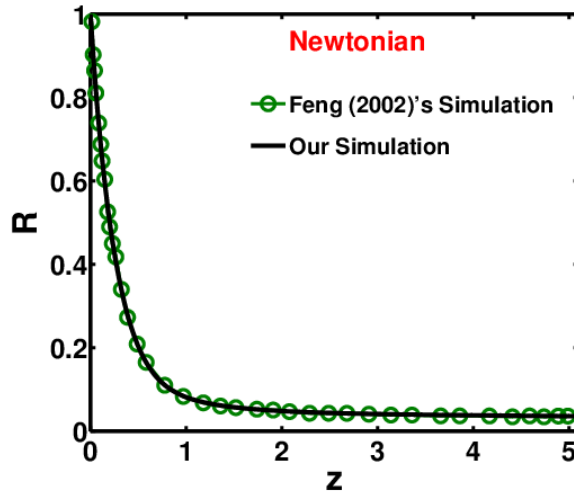

Figure 1: Comparison between thinning profile predictions of our simulation for Newtonian jets to that obtained by [1] using the following parameter values:  $Re = 4.451 \times 10^{-3}$ ,  $Fr = 8.755 \times 10^{-3}$ ,  $We = 1.099 \times 10^{-3}$ ,  $Pe = 1.835 \times 10^{-4}$ ,  $\epsilon_E = 0.7311$ ,  $\beta = 45.5$ ,  $\chi = 75$ ,  $\Omega = 5.914$ .

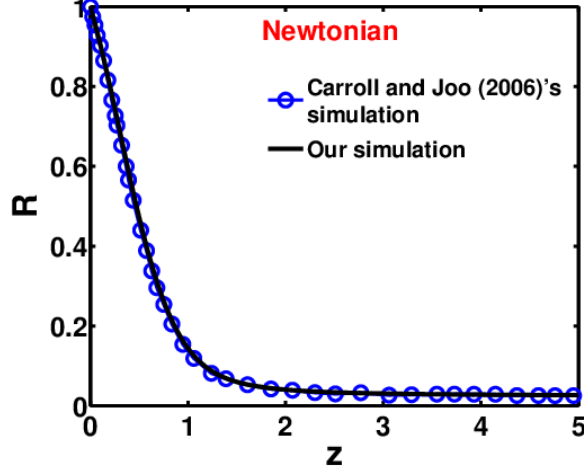

Figure 2: Comparison between thinning profile predictions of our simulation for Newtonian jets to that obtained by [2] using the following parameter values:  $Re = 9.00 \times 10^{-4}$ ,  $Fr = 9.18 \times 10^{-4}$ ,  $We = 4.43 \times 10^{-3}$ ,  $Pe = 6.53 \times 10^{-5}$ ,  $\epsilon_E = 1.469$ ,  $\beta = 41.5$ ,  $\chi = 327$ ,  $\Omega = 2.29$ .

Similarly, for polymer solutions, Giesekus and Oldroyd-B constitutive models were implemented in the current study and the results were compared with those reported by [3] and [2] respectively. As can be clearly seen from the figures 3 and 4, even for the non-Newtonian case an excellent agreement was found.

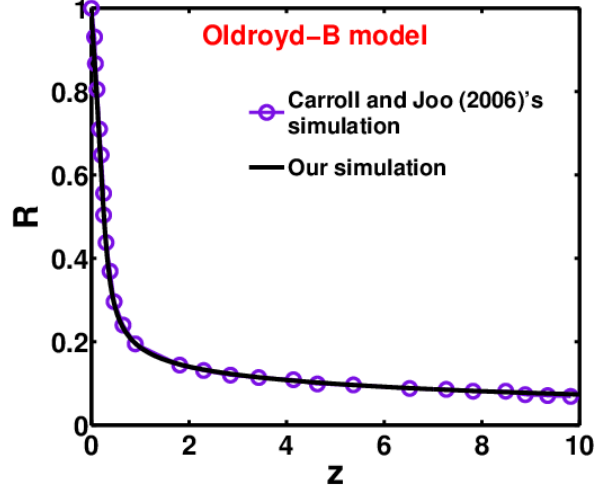

Figure 3: Comparison between thinning profile predictions of our simulation using Giesekus model to that obtained by [3] using the following parameter values:  $\text{Re} = 2.5 \times 10^{-3}$ ,  $\text{Fr} = 0.1$ ,  $\text{We} = 0.1$ ,  $\text{Pe} = 0.1$ ,  $\epsilon_E = 1$ ,  $\beta = 40$ ,  $\chi = 600$ ,  $\Omega = 0.1$ ,  $\text{De} = 10$ ,  $\alpha = 0.01$ .

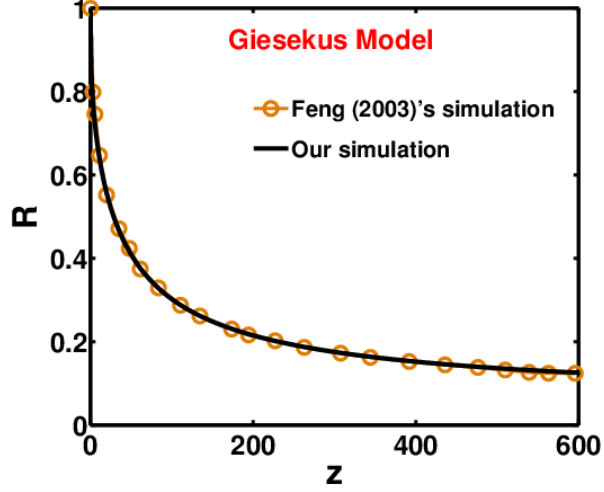

Figure 4: Comparison between thinning profile predictions of our simulation using Oldroyd-B model to that obtained by [2] using the following parameter values:  $Re = 5.15 \times 10^{-3}$ ,  $Fr = 9.18 \times 10^{-4}$ ,  $We = 1.31 \times 10^{-4}$ ,  $Pe = 2.5 \times 10^{-3}$ ,  $\epsilon_E = 10.6$ ,  $\beta = 2$ ,  $\chi = 270$ ,  $\Omega = 1.42$ ,  $De = 2.65 \times 10^{-2}$

## References

- [1] J.J. Feng. The stretching of an electrified non-newtonian jet: A model for electrospinning. *Phys. Fluids*, 14(11):3912–3926, 2002.
- [2] C.P. Carroll and Y.L. Joo. Electrospinning of viscoelastic boger fluids: Modeling and experiments. *Phys. Fluids*, 18(5), 2006.
- [3] J.J. Feng. Stretching of a straight electrically charged viscoelastic jet. *J. Non-Newtonian Fluid Mech.*, 116(1):55–70, 2003.
